# Supplementary material for: Sex Differences in the Association of Urinary Concentrations of Phthalates Metabolites with Self-Reported Diabetes and Cardiovascular Diseases in Shanghai Adults
Source: PubMed Central journal article supplement (PMC5486284; doi:10.3390/ijerph14060598), 2017-06-05
Supplement: ijerph-14-00598-s001.pdf [file ijerph-14-00598-s001.pdf]

# Sex Differences in the Association of Urinary Concentrations of Phthalate Metabolites with Self-reported Diabetes and Cardiovascular Diseases in Shanghai Adults

Ruihua Dong <sup>1</sup>, Shanzhen Zhao <sup>2</sup>, Han Zhang <sup>1</sup>, Jingsi Chen <sup>1</sup>, Meiru Zhang <sup>1</sup>, Min Wang <sup>2</sup>, Min Wu <sup>1</sup>, Shuguang Li <sup>1,\*</sup>, Bo Chen <sup>1,\*</sup>

In order to assess the co-exposure, we performed principal component analysis (PCA) using the measured values of ten metabolites (Table S1). The major component accounted for 38.9% of the source variance and was dominated by the five metabolites of DEHP. We therefore assessed the co-exposure by calculating the micromolar sum of DEHP metabolites ( $\Sigma$ DEHP) including MEHP, MEHHP, MECPP, MEOHP and MCMHP.

**Table S1.** The rotated eigenvectors of the three components after principal component analysis.

|                            | PC1   | PC2   | PC3    |
|----------------------------|-------|-------|--------|
| MEOHP                      | 0.940 | 0.114 | 0.065  |
| MECPP                      | 0.920 | 0.146 | 0.040  |
| MCMHP                      | 0.886 | 0.098 | 0.075  |
| MEHHP                      | 0.846 | 0.140 | -0.065 |
| MEHP                       | 0.765 | 0.125 | -0.098 |
| MiBP                       | 0.135 | 0.809 | 0.041  |
| MnBP                       | 0.229 | 0.798 | 0.022  |
| MMP                        | 0.069 | 0.615 | -0.208 |
| MEP                        | 0.019 | 0.317 | 0.072  |
| MBzP                       | 0.006 | 0.026 | 0.976  |
| Eigenvalues                | 3.894 | 1.850 | 1.029  |
| Variance explained (in %)  | 0.389 | 0.185 | 0.103  |
| Cumulative variance (in %) | 0.389 | 0.574 | 0.677  |

Table S2 shows the adjusted (without adjusting the dietary factors) odds of each individual outcome (DM vs. normal; hypertension vs. normal; hyperlipidemia vs. normal; CHD vs. normal; stroke vs. normal; CVD vs. normal) by quartile of phthalate concentrations.

**Table S2.** Logistic regression analyses of quartile metabolites of phthalates in association with self-reported DM and CVD ( $n = 2330$ ).

|       |                          | <b>DM</b>                      | <b>Hypertension</b> | <b>Hyperlipidaemia</b> | <b>CHD</b>        | <b>Stroke</b>      | <b>CVD</b>        |
|-------|--------------------------|--------------------------------|---------------------|------------------------|-------------------|--------------------|-------------------|
| MMP   | Q2 vs. Q1                | 1.00 (0.61, 1.65) <sup>a</sup> | 0.97 (0.71, 1.33)   | 1.33 (0.75, 2.34)      | 1.27 (0.70, 2.30) | 2.25 (0.43, 11.81) | 1.36 (0.78, 2.39) |
|       | Q3 vs. Q1                | 0.93 (0.57, 1.52)              | 1.03 (0.76, 1.39)   | 1.45 (0.84, 2.52)      | 0.82 (0.43, 1.54) | 0.95 (0.13, 6.84)  | 0.82 (0.45, 1.51) |
|       | Q4 vs. Q1                | 1.55 (0.99, 2.42)              | 1.23 (0.91, 1.66)   | 2.06 (1.23, 3.44) *    | 1.37 (0.79, 2.39) | 4.07 (0.82, 20.28) | 1.58 (0.94, 2.67) |
|       | P for trend <sup>b</sup> | 0.060                          | 0.159               | 0.005                  | 0.457             | 0.131              | 0.213             |
| MEP   | Q2 vs. Q1                | 1.04 (0.64, 1.68)              | 1.04 (0.77, 1.41)   | 0.70 (0.40, 1.22)      | 1.20 (0.67, 2.16) | 1.02 (0.75, 1.41)  | 1.43 (0.81, 2.53) |
|       | Q3 vs. Q1                | 1.03 (0.64, 1.67)              | 1.06 (0.79, 1.44)   | 0.97 (0.58, 1.61)      | 0.89 (0.48, 1.64) | 0.95 (0.69, 1.31)  | 1.15 (0.65, 2.08) |
|       | Q4 vs. Q1                | 1.47 (0.94, 2.30)              | 1.15 (0.85, 1.56)   | 1.42 (0.88, 2.27)      | 1.39 (0.80, 2.43) | 1.28 (0.93, 1.75)  | 1.18 (1.05, 3.10) |
|       | P for trend              | 0.096                          | 0.354               | 0.035                  | 0.379             | 0.007              | 0.061             |
| MiBP  | Q2 vs. Q1                | 1.05 (0.67, 1.65)              | 0.86 (0.64, 1.15)   | 1.54 (0.93, 2.58)      | 1.47 (0.84, 2.58) | 2.29 (0.44, 11.95) | 1.56 (0.91, 2.66) |
|       | Q3 vs. Q1                | 1.16 (0.74, 1.84)              | 0.81 (0.60, 1.09)   | 1.27 (0.74, 2.15)      | 0.94 (0.51, 1.75) | 0.58 (0.05, 6.49)  | 0.93 (0.51, 1.70) |
|       | Q4 vs. Q1                | 0.91 (0.57, 1.46)              | 0.94 (0.69, 1.26)   | 1.33 (0.79, 2.22)      | 1.14 (0.63, 2.05) | 4.99 (1.03, 24.17) | 1.46 (0.84, 2.51) |
|       | P for trend              | 0.824                          | 0.585               | 0.305                  | 0.937             | 0.057              | 0.473             |
| MaBP  | Q2 vs. Q1                | 0.73 (0.45, 1.19)              | 0.80 (0.59, 1.08)   | 1.41 (0.84, 2.38)      | 0.61 (0.33, 1.11) | 1.58 (0.26, 9.64)  | 0.67 (0.38, 1.18) |
|       | Q3 vs. Q1                | 0.98 (0.62, 1.55)              | 0.78 (0.58, 1.06)   | 1.41 (0.84, 2.36)      | 0.83 (0.47, 1.47) | 2.86 (0.54, 15.22) | 0.94 (0.58, 1.67) |
|       | Q4 vs. Q1                | 1.07 (0.69, 1.66)              | 0.78 (0.58, 1.04)   | 1.12 (0.66, 1.88)      | 0.83 (0.48, 1.43) | 4.05 (0.79, 20.88) | 1.02 (0.61, 1.71) |
|       | P for trend              | 0.516                          | 0.101               | 0.493                  | 0.750             | 0.057              | 0.623             |
| MBzP  | Q2 vs. Q1                | 0.66 (0.40, 1.07)              | 0.76 (0.56, 1.03)   | 0.89 (0.53, 1.51)      | 0.61 (0.33, 1.14) | 1.69 (0.48, 5.92)  | 0.75 (0.43, 1.31) |
|       | Q3 vs. Q1                | 0.93 (0.60, 1.45)              | 0.73 (0.54, 0.98)   | 1.09 (0.67, 1.77)      | 0.68 (0.38, 1.20) | 0.49 (0.09, 2.74)  | 0.67 (0.38, 1.13) |
|       | Q4 vs. Q1                | 1.05 (0.67, 1.63)              | 0.98 (0.72, 1.31)   | 1.21 (0.75, 1.98)      | 1.22 (0.72, 2.05) | 0.76 (0.17, 3.47)  | 1.15 (0.70, 1.89) |
|       | P for trend              | 0.529                          | 0.809               | 0.321                  | 0.427             | 0.397              | 0.680             |
| MEHP  | Q2 vs. Q1                | 0.90 (0.56, 1.44)              | 0.88 (0.65, 1.19)   | 0.64 (0.38, 1.06)      | 0.48 (0.25, 0.94) | 0.95 (0.25, 3.60)  | 0.54 (0.30, 1.00) |
|       | Q3 vs. Q1                | 0.92 (0.58, 1.46)              | 0.71 (0.52, 0.96)   | 0.52 (0.31, 0.88)      | 0.87 (0.50, 1.53) | 0.67 (0.16, 2.89)  | 0.84 (0.49, 1.42) |
|       | Q4 vs. Q1                | 1.00 (0.64, 1.57)              | 1.07 (0.79, 1.45)   | 0.91 (0.58, 1.43)      | 1.07 (0.63, 1.81) | 1.02 (0.26, 3.40)  | 1.07 (0.65, 1.76) |
|       | P for trend              | 0.947                          | 0.977               | 0.675                  | 0.399             | 0.892              | 0.454             |
| MEOHP | Q2 vs. Q1                | 0.85 (0.50, 1.45)              | 0.83 (0.62, 1.13)   | 0.75 (0.43, 1.30)      | 1.06 (0.60, 1.86) | 1.14 (0.28, 4.69)  | 1.08 (0.64, 1.84) |
|       | Q3 vs. Q1                | 1.69 (1.06, 2.70)*             | 0.75 (0.55, 1.01)   | 1.30 (0.79, 2.13)      | 0.72 (0.40, 1.31) | 1.00 (0.22, 4.61)  | 0.76 (0.44, 1.32) |
|       | Q4 vs. Q1                | 1.52 (0.94, 2.45)              | 1.02 (0.75, 1.38)   | 1.25 (0.76, 2.07)      | 0.96 (0.54, 1.70) | 1.69 (0.44, 6.56)  | 1.04 (0.61, 1.78) |
|       | P for trend              | 0.011                          | 0.942               | 0.124                  | 0.599             | 0.493              | 0.802             |
| MEHHP | Q2 vs. Q1                | 1.72 (0.86, 2.36)              | 0.67 (0.51, 0.95)   | 0.80 (0.47, 1.37)      | 0.57 (0.32, 1.03) | 2.16 (0.38, 12.15) | 0.68 (0.39, 1.18) |
|       | Q3 vs. Q1                | 1.40 (0.84, 2.32)              | 0.79 (0.58, 1.07)   | 1.31 (0.81, 2.14)      | 0.69 (0.39, 1.21) | 3.52 (0.68, 18.16) | 0.85 (0.50, 1.44) |
|       | Q4 vs. Q1                | 1.70 (1.03, 2.79)              | 1.08 (0.79, 1.47)   | 0.85 (0.50, 1.46)      | 0.72 (0.41, 1.28) | 2.48 (0.44, 14.08) | 0.84 (0.49, 1.44) |
|       | P for trend              | 0.059                          | 0.387               | 0.884                  | 0.443             | 0.246              | 0.771             |
| MECPP | Q2 vs. Q1                | 1.29 (0.76, 2.17)              | 0.87 (0.64, 1.17)   | 0.83 (0.49, 1.43)      | 0.75 (0.41, 1.36) | 1.00 (0.25, 4.11)  | 0.77 (0.44, 1.35) |
|       | Q3 vs. Q1                | 1.77 (1.08, 2.90) *            | 0.88 (0.66, 1.19)   | 1.41 (0.87, 2.29)      | 0.96 (0.55, 1.68) | 1.10 (0.27, 4.54)  | 0.97 (0.58, 1.64) |
|       | Q4 vs. Q1                | 1.86 (1.151, 3.12) *           | 1.13 (0.83, 1.54)   | 1.20 (0.72, 2.01)      | 0.98 (0.55, 1.74) | 1.34 (0.32, 5.61)  | 1.01 (0.59, 1.74) |
|       | P for trend              | 0.005                          | 0.455               | 0.175                  | 0.811             | 0.684              | 0.741             |

**Table S2. Cont.**

|       |             |                   |                   |                     |                   |                   |                   |
|-------|-------------|-------------------|-------------------|---------------------|-------------------|-------------------|-------------------|
| MCMHP | Q2 vs. Q1   | 1.17 (0.72, 1.90) | 0.98 (0.72, 1.31) | 1.37 (0.80, 2.34)   | 1.06 (0.61, 1.83) | 1.31 (0.34, 4.96) | 1.10 (0.66, 1.83) |
|       | Q3 vs. Q1   | 1.55 (0.98, 2.46) | 0.82 (0.61, 1.11) | 1.96 (1.18, 3.25) * | 0.65 (0.36, 1.17) | 0.89 (0.20, 4.07) | 0.66 (0.38, 1.16) |
|       | Q4 vs. Q1   | 1.25 (0.77, 2.03) | 1.17 (0.86, 1.59) | 1.55 (0.90, 2.65)   | 1.02 (0.59, 1.78) | 1.25 (0.30, 5.17) | 1.04 (0.62, 1.75) |
|       | P for trend | 0.207             | 0.577             | 0.047               | 0.661             | 0.676             | 0.895             |
| ΣDEHP | Q2 vs. Q1   | 0.98 (0.59, 1.63) | 0.78 (0.57, 1.06) | 0.91 (0.54, 1.53)   | 0.71 (0.39, 1.29) | 1.10 (0.31, 3.93) | 0.76 (0.44, 1.32) |
|       | Q3 vs. Q1   | 1.19 (0.74, 1.92) | 0.82 (0.60, 1.11) | 0.92 (0.55, 1.52)   | 0.62 (0.35, 1.12) | 0.42 (0.08, 2.24) | 0.59 (0.34, 1.03) |
|       | Q4 vs. Q1   | 1.42 (0.89, 2.27) | 1.12 (0.83, 1.51) | 1.16 (0.71, 1.89)   | 0.99 (0.57, 1.70) | 0.97 (0.25, 3.80) | 0.98 (0.59, 1.64) |
|       | p for trend | 0.088             | 0.410             | 0.520               | 0.965             | 0.683             | 0.827             |

Q1 is set as the reference. <sup>a</sup> Odds ratios (95% confidence intervals). Models were adjusted for age, sex, education, marriage, smoking, BMI. <sup>b</sup> p-value for trends across the lowest quartile (Q1) to the highest quartile (Q4). \*  $p < 0.05$  for tested odds ratios. BMI = body mass index; DM = diabetes mellitus; CVD = cardiovascular disease; CHD = coronary heart disease; Q = quartile.
